# Supplementary material for: Flexible random resistive access memory devices with ferrocene–rGO nanocomposites for artificial synapses
Source: Royal Society of Chemistry journal article supplement (doi:10.1039/d1tc00227a), 2021-01-01
Supplement: d1tc00227a1.pdf [file d1tc00227a1.pdf]

# Supporting Information

## for

# Flexible Random Resistive Access Memory with FeC-rGO Nanocomposites for Artificial Synapses

Jiankui Zhou,<sup>a</sup> Hanfang Feng,<sup>a</sup> Yadong Wang,<sup>a</sup> Qingqing Sun,<sup>a</sup> Yingliang Liu,<sup>a</sup> Xuying Liu<sup>\*a</sup>,

Li Zhang<sup>\*a</sup> and Shaokui Cao<sup>\*ab</sup>

<sup>a</sup> School of Materials Science and Engineering, Zhengzhou University, Zhengzhou 450001,

People's Republic of China

<sup>b</sup> Henan Key Laboratory of Advanced Nylon Materials and Application, Zhengzhou

University, Zhengzhou 450001, People's Republic of China.

### Characterization of FeC-rGO nanocomposite.

**Fig. S1** shows the FTIR spectra of FeC, GO, rGO and FeC-rGO. Different from GO, the absorption peak of FeC-rGO disappears at 1723 cm<sup>-1</sup>, suggesting the C=O in the FeC-rGO has been reduced.<sup>S1, S2</sup> There appear obvious absorption peaks at 1630 cm<sup>-1</sup>, 1389 cm<sup>-1</sup> and 1050 cm<sup>-1</sup>, corresponding to the C=C stretching vibration of rGO, C-H bending vibration of ferrocene, and C-Fe stretching vibration, respectively.<sup>S3</sup> Moreover, C-H stretching vibration

of FeC-rGO is red-shift relative to that of FeC, which is an evidence of the stronger interaction between FeC and rGO.<sup>S4, S5</sup>

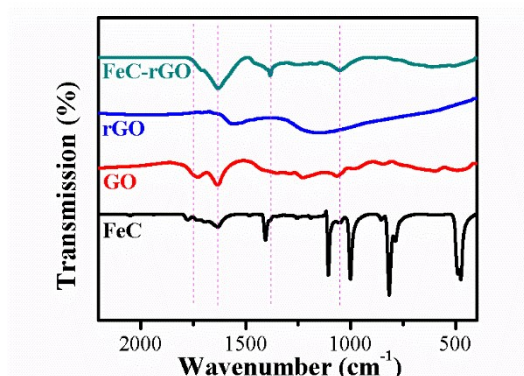

**Fig. S1** FTIR spectra of FeC, GO, rGO and FeC-rGO.

Compared to GO, the  $\pi \rightarrow \pi^*$  absorption peak of rGO-FeC is red-shift to 269 nm, and the  $n \rightarrow \pi^*$  absorption peak ( $\lambda=304$  nm) disappears, suggesting that the rGO is fully reduced by ascorbic acid.<sup>S6</sup> Additionally, there appears a wider shoulder peak at 300~600 nm for rGO-FeC, which is caused by the stronger electronic interaction between FeC and rGO.<sup>S7</sup> As shown in **Fig. S2**, the rGO-FeC can well disperse in ethanol. Unlike GO, the ethanol dispersion solution of FeC-rGO is black, suggesting that the graphene in the complex has been reduced.

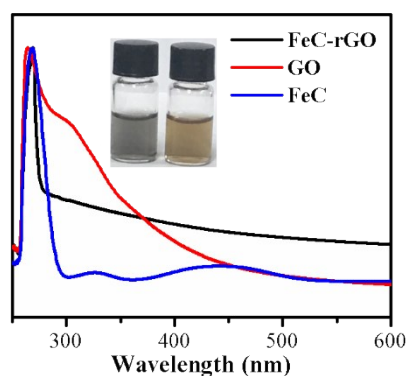

**Fig. S2** UV-Vis spectra of FeC, GO and FeC-rGO.

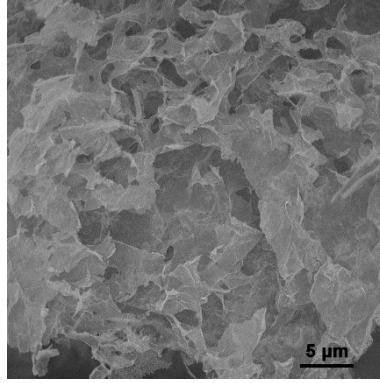

**Fig. S3** SEM images of rGO.

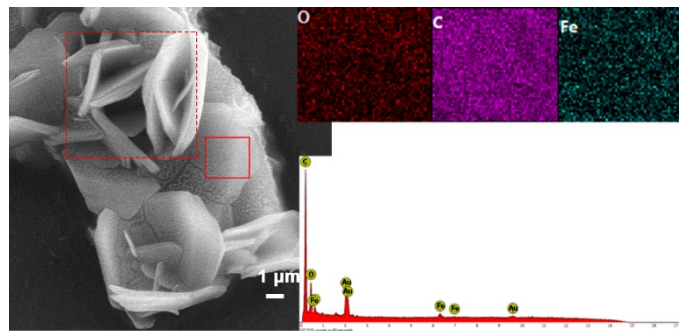

**Fig. S4** SEM images of FeC-rGO and corresponding O, C, Fe mapping (rectangle area marked with red solid line) and EDS; The rectangle area using red dotted line shows the stacked lamellar structure of FeC-rGO.

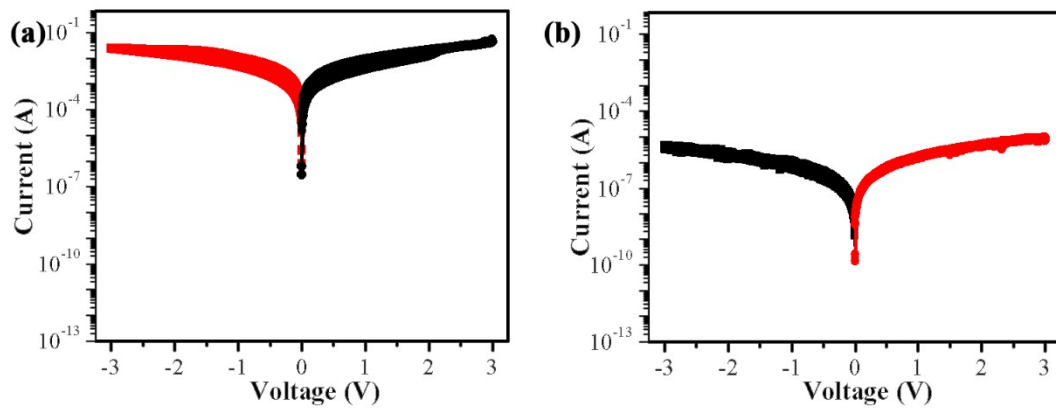

**Fig. S5.** Representative I-V curves of (a) Al/rGO/ITO and (b) Al/FeC/ITO devices.

**Table S1** Comparison of memory performance of FeC-related memristor devices

| Material                                                                                                                          | Device Structure                            | ON/OFF                                | V <sub>SET</sub> /V <sub>RESET</sub> | Retenion          | WRER            | Ref. |
|-----------------------------------------------------------------------------------------------------------------------------------|---------------------------------------------|---------------------------------------|--------------------------------------|-------------------|-----------------|------|
| Ferrocenylphenyl-NHCO-GO                                                                                                          | Al/FPArGO/ITO, 50nm                         | ~10 <sup>3</sup>                      | 2.1 / -1.9                           | 1000s             | 1000            | S8   |
| PFT2-Fc                                                                                                                           | Al/PFT2-Fc/LiF/ITO,<br>50 to 60 nm          | ~10 <sup>3</sup>                      | -1.9 / 1.4                           | 7h                | 100             | S9   |
| Ferrocene-containing<br>metallopolymers*                                                                                          | Au/Polymer/ITO/Glass,<br>120 nm and 80 nm   | <10 <sup>2</sup>                      | 1.89, 1.54                           | -                 | -               | S10  |
| DAFcTPA/6FDA PI (PI-xFc)                                                                                                          | Au/PI-xFc/ITO, ~50 nm                       | 10 <sup>3</sup>                       | 1.4 / -3.2                           | 4000s             | 10 <sup>8</sup> | S11  |
| Stb-1G-FcD                                                                                                                        | Al/dendrimer/LiF/ITO, 50nm                  | ~10 <sup>3</sup>                      | -2.8 / 2.8                           |                   |                 | S12  |
| Py-Fc                                                                                                                             | Al/Py-Fc/ITO, 50nm                          | >10 <sup>3</sup>                      | -1.6 / ~3                            | 12000s            | 10 <sup>3</sup> | S13  |
| Ferrocene-terminated<br>hyperbranched polyimide<br>(HBPI-Fc)*                                                                     | Al/HBPI-Fc/ITO, 50nm                        | 10 <sup>4</sup>                       | 2.2 / -2.6                           | 10 <sup>4</sup> s | -               | S14  |
| Ferrocene-terminated<br>hyperbranched polyimide<br>(HBPI-Fc)*                                                                     | Al/HBPI-Fc/ITO, 50nm                        | 10 <sup>4</sup>                       | 2.5 to 3.2 /<br>-3.3 to -2.7         | 10 <sup>4</sup> s | -               | S15  |
| Ferrocene-g-6FDA/DHTM<br>PI                                                                                                       | Au  ferrocene-g-6FDA/DHTM<br>PI  ITO, ~50nm | 10 <sup>3</sup>                       | ~1.5 / -3.0                          | 300s              | -               | S16  |
| Non-conjugated ferrocene-<br>containing copolymers FcCP                                                                           | Al/FcCP/ITO, ~50nm                          | 10 <sup>3</sup> to<br>10 <sup>4</sup> | -0.5 to -2.5<br>/ 3.2 to 3.7         | 10 <sup>4</sup> s | 10 <sup>4</sup> | S17  |
| Conjugated ferrocene-<br>containing<br>poly(fluorenylethynylene)s<br>(PFcFE1-PFcFE4)                                              | Al/PFcFE/ITO, ~50nm                         | 10 <sup>3</sup> to<br>10 <sup>4</sup> | ~0.5 / ~3                            | 3000 s            | 10 <sup>5</sup> | S18  |
| PFTPA-Fc (redox active<br>moieties of triphenylamine<br>(TPA) and ferrocene (Fc)<br>onto the pendants of fluorene<br>skeletons) # | Pt/PFTPA-Fc/ITO, ~130 nm                    | -                                     | -                                    | -                 | -               | S19  |
| This work                                                                                                                         | Al/FeC-rGO/ITO, ~100 nm                     | 10 <sup>8</sup>                       | -1.7/+2.1                            | 10 <sup>5</sup>   | 500             |      |

\*Write Once Read Many times memory (WORM)

# Memristors

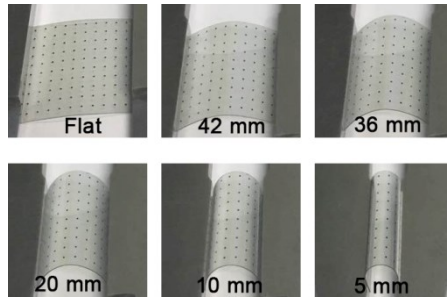

**Fig. S6.** Photographs of flexible Al/FeC-rGO/ITO/PET devices of flat and different bending radius.

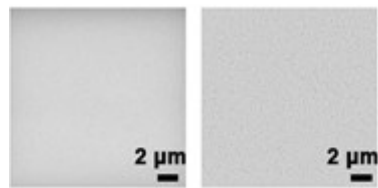

**Fig. S7.** SEM images of the surfaces of the flexible device before (Left) and after (Right) bending

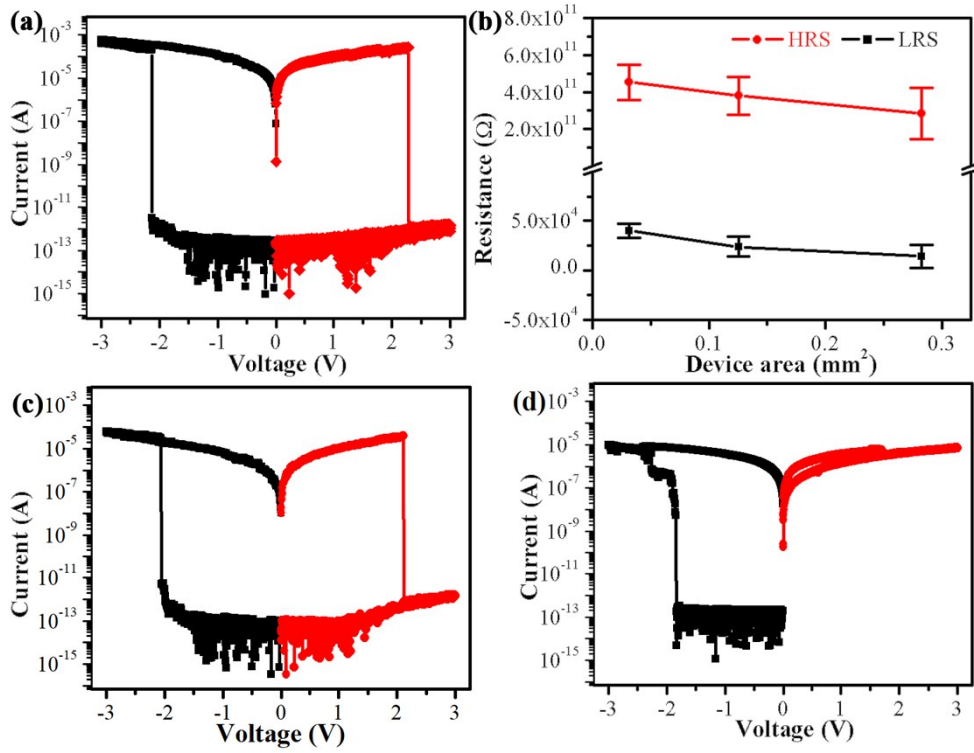

**Fig. S8.** (a) I-V curve of Au/FeC-rGO/ITO device; (b) LRS/HRS resistance of Al/FeC-rGO/ITO with different areas; (c) I-V curve of Al/FeC-rGO/Al device; (d) I-V curve of Al/GO-FeC/ITO device.

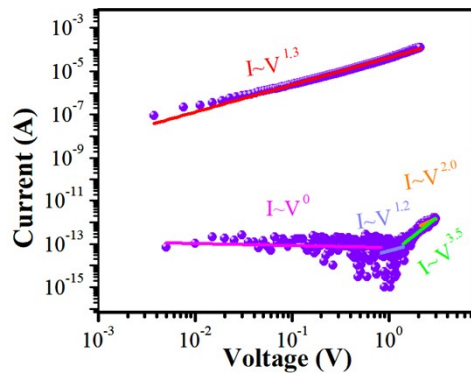

**Fig. S9.** log(I)-log(V) plot of RESET process

**Table S2** coefficient and R\_square of SET and RESET processes.

| Processes | 1           | 2           | 3           | 4           | 5           |             |
|-----------|-------------|-------------|-------------|-------------|-------------|-------------|
| SET       | Interval    | -0.005 to - | -0.175 to - | -1.025 to - | -1.440 to - | -3.000 to - |
|           | (V)         | 0.175       | 1.025       | 1.440       | 1.700       | 0.005       |
|           | coefficient | 0           | 1.2         | 2.8         | 24.6        | 1.3         |
|           | R_square    | 0.0227      | 0.1376      | 0.3357      | 0.8257      | 0.9804      |
| RESET     | Interval    | 0.005 to    | 2.110 to    | 3.000 to    | 1.395 to    | 0.820 to    |
|           | (V)         | 2.110       | 3.000       | 1.395       | 0.820       | 0.005       |
|           | coefficient | 1.3         | 2.0         | 3.5         | 1.2         | 0           |
|           | R_square    | 0.9915      | 0.8474      | 0.9236      | 0.6628      | 0.1316      |

## Reference

- S1 M. Kudus, M. Zakari, H. Akil, F. Ullah and F. Javed, *J. King Saud University*, 2020, **32**, 910.
- S2 Z. Hou, Y. Zhou, S. Wang, M. Wang, X. Hu, L. Zhou and G. Li, *Adv. Mater. Res.*, 2013, **807**, 2805.
- S3 J. Enlow, H. Jiang, J. T. Grant, K. Eyink, W. Su and T. J. Bunning, *Polymer*, 2008, **49**, 4042.
- S4 M. J. Deka and D. Chowdhury, *J. Phys. Chem. C*, 2016, **24**, 218.
- S5 K. Deng, J. Zhou and X. Li, *Electrochim. Acta*, 2013, **95**, 18.
- S6 A. D. Adhikari, R. Oraon, S. K. Tiwari, N. K. Jena, J. H. Lee, N. H. Kim and G. C. Nayak, *Chem.-Asian J.*, 2017, **12**, 900.
- S7 C. Su, L. Ji, L. Xu, X. Zhu, H. He, Y. Lv, M. Ouyang and C. Zhang, *RSC Adv.*, 2015, **5**, 14053.
- S8 C. Jin, J. Lee, E. Lee, E. Hwang and H. Lee, *Chem. Commun.*, 2012, **48**, 4235.
- S9 T. Choi, K. Lee, W. Joo, S. Lee, T. Lee and M. Chae, *J. Am. Chem. Soc.*, 2007, **129**, 9842.

- S10 X. Cheng, A. Md, H. Lian, Z. Zhong, H. Guo, Q. Dong and V. Roy, *J. Organomet. Chem.*, 2019, **892**, 34.
- S11 R. Hao, N. Jia, G. Tian, S. Qi, L. Shi, X. Wang and D. Wu, *Mater. Design*, 2017, **139**, 298.
- S12 C. Kim, W. Joo, E. S. Song, H. J. Kim, J. Kim, C. Park, H. L. Lee and C. Kiml, *Synthetic Met.*, 2007, **157**, 640.
- S13 Y. Li, X. Zhu, Y. Li, M. Zhang, C. Ma, H. Li, J. Lu and Q. Zhang, *ACS appl. Mater. interfaces*, 2019, **11**, 40332.
- S14 H. Tan, H. Yao, Y. Song, S. Zhu, H. Yu and S. Guan, *Dyes Pigments*, 2017, **146**, 210.
- S15 H. Tan, H. Yu, Y. Song, S. Zhu, B. Zhang, H. Yao and S. Guan, *J. Polym. Sci. Pol. Chem.*, 2018, **56**, 505.
- S16 G. Tian, S. Qi, F. Chen, L. Shi, W. Hu and D. Wu, *Appl. Phys. Lett.*, 2011, **98**, 203302.
- S17 J. Xiang, X. Li, Y. Ma, Q. Zhao, C. Ho and W. Wong, *J. Mater. Chem. C*, 2018, **6**, 11348.
- S18 J. Xiang, T. Wang, Q. Zhao, W. Huang, C. Ho and W. Wong, *J. Mater. Chem. C*, 2015, **4**, 921.
- S19 B. Zhang, F. Fan, W. Xue, G. Liu, Y. Fu, X. Zhuang, X. H. Xu, J. Gu, R. W. Li and Y. Chen, *Nat. Commun.*, 2019, **10**, 736.
